# Supplementary material for: Clinical Utility of Comprehensive Genomic Profiling Tests Using MTB Management System at a Single Center in Japan
Source: Research Square preprint supplement (doi:10.21203/rs.3.rs-5501115/v1), 2025-04-17
Supplement: Supplementary file 1 [file 2c2fa0b2f6a6353c94c9a9e7.docx]

| Supplementary Table 1. Genes, biomarkers and administered drugs that lead to treatment recommendations in Figure 3. | | |
| --- | --- | --- |
| No. | Gene or biomarker | Drug |
| 1 | CDK4 | Fulvestrant/Palbociclib |
| 2 | TSC1/2 | Everolimus |
| 3 | BRAF | Encorafenib/Binimetinib |
| 4 | NTRK1 | Entrectinib |
| 5 | ROS1 | Entrectinib |
| 6 | TMB-H | Pembrolizumab |
| 7 | ERBB2 | Trastuzumab |
| 8 | KRAS | Cetuximab |
| 9 | BRCA1/2 | Olaparib |
| 10 | TMB-H | Pembrolizumab |
| 11 | TMB-H | Pembrolizumab |
| 12 | BRCA1/2 | Olaparib |
| 13 | ERBB2 | Investigational drug |
| 14 | ALK | Alectinib |
| 15 | BRAF | Encorafenib/Binimetinib |
| 16 | BRCA1/2 | Olaparib |
| 17 | TMB-H | Pembrolizumab |
| 18 | FGFR2 | Pemigatinib |
| 19 | TP53/MDM2 | Investigational drug |
| 20 | RET | Investigational drug |
| 21 | BRCA1/2 | Olaparib |
| 22 | PALB2 | Platinum-based drug |
| 23 | BRCA1/2 | Olaparib |
| 24 | TP53/MDM2 | Investigational drug |
| 25 | BRCA1/2 | Olaparib |
| 26 | BRCA1/2 | Olaparib |
| 27 | FGFR2 | Pemigatinib |
| 28 | KRAS | Investigational drug |
| 29 | BRCA1/2 | Olaparib |
| 30 | BRCA1/2 | Olaparib |
| 31 | BRAF | Dabrafenib/Trametinib |
| 32 | TMB-H | Pembrolizumab |
| 33 | TMB-H | Pembrolizumab |
| 34 | ERBB2 | Investigational drug |
| 35 | BRCA1/2 | Platinum-based drug |
| 36 | BRAF | Encorafenib/Binimetinib |
| 37 | BRCA1/2 | Olaparib |
| 38 | TMB-H | Pembrolizumab |
| 39 | BRCA1/2 | Olaparib |
| 40 | BRAF | Encorafenib/Binimetinib |
| 41 | TMB-H | Investigational drug |
| 42 | ERBB2 | Trastuzumab |
| 43 | ERBB2 | Trastuzumab |
| 44 | BRCA1/2 | Olaparib |
| 45 | KIT/PDGFRA | Investigational drug |
| 46 | BRCA1/2 | Olaparib |
| 47 | BRAF | Investigational drug |
| 48 | TMB-H | Pembrolizumab |
| 49 | MET | Tepotinib |
| 50 | TMB-H | Pembrolizumab |
| 51 | ERBB2 | Trastuzumab/Pertuzumab |
| 52 | FGFR2 | Futibatinib |
| 53 | BRCA1/2 | Olaparib |
| 54 | BRCA1/2 | Platinum-based drug |
| 55 | TMB-H | Pembrolizumab |
| 56 | TMB-H | Investigational drug |
| 57 | TMB-H | Pembrolizumab |
| 58 | ERBB2 | Investigational drug |
| 59 | ERBB2 | Investigational drug |
| 60 | BRAF | Dabrafenib/Trametinib |
| 61 | ESR1 | Fulvestrant/Palbociclib |
| 62 | TMB-H | Pembrolizumab |
| 63 | PIK3CA | Investigational drug |
| 64 | FGFR2 | Pemigatinib |
| 65 | ERBB2 | Trastuzumab/Pertuzumab |
| 66 | HRD | Olaparib |
| 67 | ERBB2 | Trastuzumab/Pertuzumab |
| 68 | BRCA1/2 | Olaparib |
| 69 | HRD | Niraparib |
| 70 | BRAF | Investigational drug |
| 71 | BRAF | Investigational drug |
| 72 | TMB-H | Nivolumab |
| 73 | EGFR | Afatinib |
| 74 | NTRK3 | Entrectinib |
| 75 | KIT/PDGFRA | Imatinib |
| 76 | FGFR2 | Investigational drug |
| 77 | KIT/PDGFRA | Investigational drug |
| 78 | ERBB2 | Investigational drug |
| 79 | ERBB2 | Trastuzumab/Pertuzumab |
| 80 | TMB-H | Pembrolizumab |
| 81 | TMB-H | Pembrolizumab |
| 82 | TMB-H | Pembrolizumab |
| 83 | BRAF | Investigational drug |
| 84 | ERBB2 | Trastuzumab/Pertuzumab |
| 85 | TMB-H | Pembrolizumab |
| 86 | FGFR1 | Investigational drug |
| 87 | BRCA1/2 | Olaparib |
| 88 | TMB-H | Pembrolizumab |
| 89 | ERBB2 | Trastuzumab |
| 90 | TMB-H | Pembrolizumab |
| 91 | ERBB2 | Investigational drug |
| 92 | KIT/PDGFRA | Imatinib |
| 93 | TSC1/2 | Everolimus |
| 94 | KRAS | Sotorasib |
| 95 | TP53/MDM2 | Investigational drug |
| 96 | TMB-H | Pembrolizumab |
| 97 | ERBB2 | Trastuzumab deruxtecan |
| 98 | BRCA1/2 | Olaparib |
| 99 | ERBB2 | Investigational drug |
| 100 | TMB-H | Pembrolizumab |
| 101 | TMB-H | Pembrolizumab |
| 102 | FGFR2 | Investigational drug |
| 103 | BRCA1/2 | Olaparib |
| 104 | PIK3CA | Capivasertib |
| 105 | TMB-H | Pembrolizumab |
| 106 | CCND1 | Investigational drug |
| 107 | PIK3CA | Capivasertib |
| 108 | TMB-H | Pembrolizumab |
| 109 | TMB-H | Pembrolizumab |
| 110 | TMB-H | Pembrolizumab |
| 111 | BRAF | Encorafenib/Binimetinib |
| 112 | TMB-H | Pembrolizumab |
| 113 | BRCA1/2 | Olaparib |
| 114 | BRAF | Encorafenib/Binimetinib |
| 115 | PIK3CA | Capivasertib |
| 116 | FGFR2 | Futibatinib |
| 117 | BRAF | Dabrafenib/Trametinib |
