# Supplementary material for: Clinical Utility of Comprehensive Genomic Profiling Tests Using MTB Management System at a Single Center in Japan
Source: Research Square preprint supplement (doi:10.21203/rs.3.rs-5501115/v1), 2025-04-17
Supplement: Supplementary file 2 [file 92d0abee5f530f6e497d392b.docx]

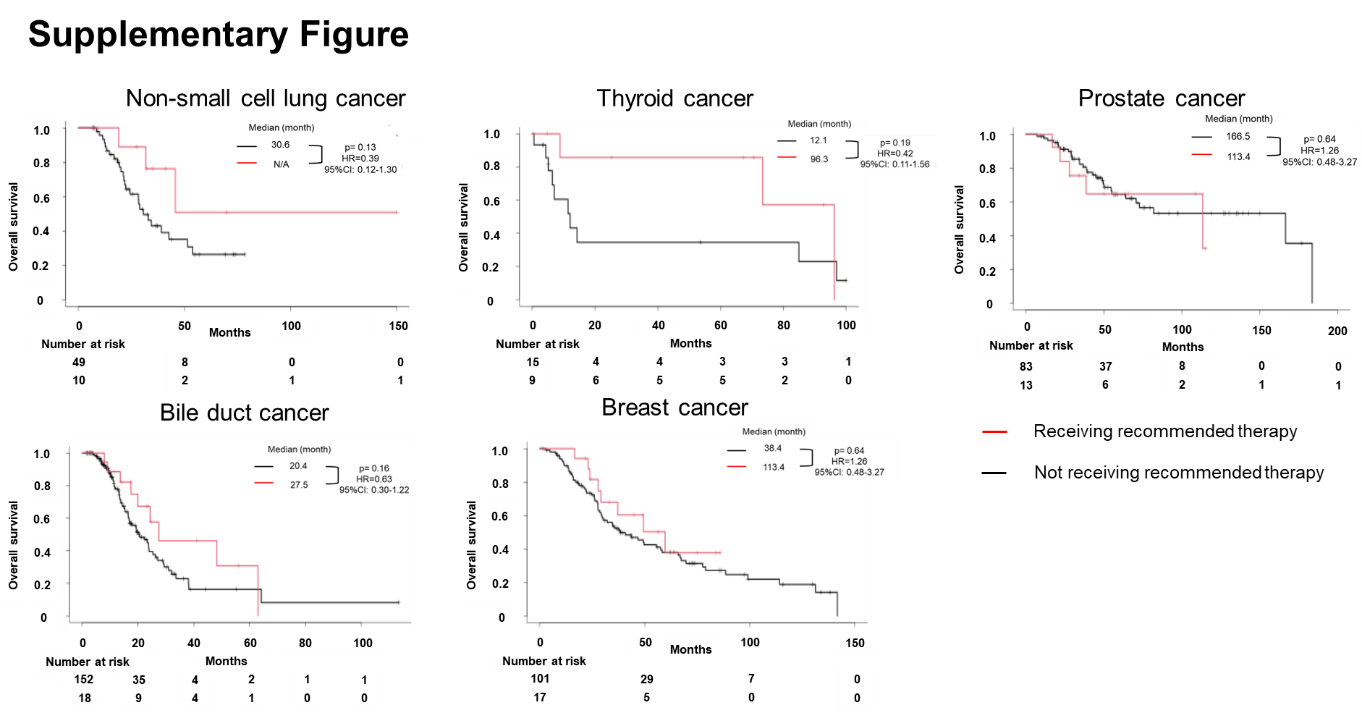


Supplementary Figure. Kaplan–Meier plots for overall survival from 1st line chemotherapy based on MTB-recommended treatment for each cancer type. No significant differences were observed in the overall survival of the groups.
